# Supplementary material for: Skewer: a fast and accurate adapter trimmer for next-generation sequencing paired-end reads
Source: PubMed Central journal article supplement (PMC4074385; doi:10.1186/1471-2105-15-182), 2014-06-12
Supplement: 1471-2105-15-182-S5.pdf [file 1471-2105-15-182-S5.pdf]

## Appendix A. Proofs

**Lemma 1.** In the Dynamic Programming Matrix  $C_{m \times n}$  for tackling the *k-difference Problem*, the values of elements along each diagonal are monotonically non-decreasing.

*Proof:* For any two adjacent elements along a diagonal, if the data flow to the right bottom element is from the left top one, then as the penalty (or distance) is non-negative and accumulative, the right bottom element cannot be smaller than the left top one; otherwise, without loss of generality, suppose the data flow to the right bottom element<sup>1</sup>  $C_{i,j}$  is from its top neighbor  $C_{i-1,j}$ , and suppose  $C_{i,j} < C_{i-1,j-1}$ , then  $C_{i-1,j} = C_{i,j} - 1 < C_{i-1,j-1} - 1$ , so the data flow to  $C_{i-1,j}$  are from neither  $C_{i-1,j-1}$  nor  $C_{i-2,j-1}$ , otherwise result in  $C_{i-1,j-1} < C_{i-1,j} < C_{i-1,j-1} - 1$  or  $C_{i-2,j-1} \leq C_{i-1,j} < C_{i-1,j-1} - 1$ , but from the recurrence logic,  $C_{i-2,j-1} \geq C_{i-1,j-1} - 1$ , contradictory. The same reasoning is applied for all the elements above  $C_{i,j}$ , and finally we have  $C_{0,j} = C_{i,j} - i < C_{i-1,j-1} - i$ . But from the recurrence logic, we have  $C_{0,j-1} \geq C_{1,j-1} \geq \dots \geq C_{i-1,j-1} - (i-1)$ , so  $C_{0,j-1} - C_{0,j} > 1$ . Which is not true for the recurrence start condition. In conclusion, in all cases  $C_{i,j} \geq C_{i-1,j-1}$ . ■

**Lemma 2.** If the penalty for an insertion/deletion is  $D$ , the maximum penalty for a mismatch is  $P$ , then  $\Delta h_{i,j} = C_{i,j} - C_{i,j-1} \in [-D, D]$ ;  $\Delta v_{i,j} = C_{i,j} - C_{i-1,j} \in [-D, D]$ ;  $\Delta d_{i,j} = C_{i,j} - C_{i-1,j-1} \in [0, \min(P, 2D)]$ .

*Proof:* From the dynamic programming recurrence,  $C_{i,j} \leq C_{i,j-1} + D$ , thus  $C_{i,j} - C_{i,j-1} \leq D$ . From Lemma 1,  $C_{i,j} \geq C_{i-1,j-1} \geq C_{i,j-1} - D$ , thus  $C_{i,j} - C_{i,j-1} \geq -D$ , hence,  $C_{i,j} - C_{i,j-1} \in [-D, D]$ ; similarly,  $C_{i,j} - C_{i-1,j} \in [-D, D]$ ; From Lemma 1,  $C_{i,j} - C_{i-1,j-1} \geq 0$ , From the dynamic programming recurrence  $C_{i,j} - C_{i-1,j-1} \leq P$ ; also  $C_{i,j} \leq C_{i-1,j} + D \leq C_{i-1,j-1} + 2D$ , thus  $C_{i,j} - C_{i-1,j-1} \in [0, \min(P, 2D)]$ . ■

<sup>1</sup>  $C_{i,j}$  and  $C[i,j]$  denote the same element in our nomenclature
