# Supplementary material for: Skewer: a fast and accurate adapter trimmer for next-generation sequencing paired-end reads
Source: PubMed Central journal article supplement (PMC4074385; doi:10.1186/1471-2105-15-182), 2014-06-12
Supplement: 1471-2105-15-182-S6.pdf [file 1471-2105-15-182-S6.pdf]

## Appendix B. Algorithms

**Algorithm 2.** *bit-masked k-differences matching algorithm with quality values aware*<sup>1</sup>

## Preprocessing

```
1: for a in [A,C,G,T,N] do
2:   calculate a bit vector misBits[a] in comparison with P
3: end for
```

## Alignment

```
4: legalBits = 0
5: penalK = k × ((Pmin + Pmax) / 2)
6: for i=1 to [penalK/delta] do
7:   Q.pushBack(idx=-i,dif=delta×i)
8:   legalBits = (legalBits << 1) | 1
9: end for
10: for j=0 to n-1 do
11:  d = (P0≠Sj)? qual2penalty(qvj):0
12:  Q.pushFront(idx=j,dif=d)
13:  legalBits = (legalBits << 1) | 1
14:  for i=1 to Q.size()-1 && (legalBits(i) & misBits[Sj](i)) do
15:    Q[i].dif = Q[i].dif + (qual2penalty(qvj) - delta)
16:    q=argminr=i-1i+1(Q[r].dif)
    {r≠i+1 for the last iteration}
17:    Q[i].dif = Q[q].dif + delta
18:    Q[i].idx = Q[q].idx
19:    if Q[i].dif > penalK then
20:      legalBits &= ~(1 << i)
21:    end if
22:  end for
23:  while Q.back().dif > penalK do
24:    Q.popBack()
25:  end while
26:  if Q.size() == m then
27:    report Q.back().idx;
28:    Q.popBack()
29:  end if
30: end for
31: function qual2penalty(qual)
32:  return Pmin + qual/qualitymax × (Pmax - Pmin)
33: end
```

<sup>1</sup> P<sub>min</sub>: minimum penalty for a mismatch; P<sub>max</sub>: maximum penalty for a mismatch; delta=P<sub>max</sub>: penalty for an indel; quality<sub>max</sub>=40: maximum possible quality value; qv: quality sequence corresponding to S
