# Supplementary material for: Skewer: a fast and accurate adapter trimmer for next-generation sequencing paired-end reads
Source: PubMed Central journal article supplement (PMC4074385; doi:10.1186/1471-2105-15-182), 2014-06-12
Supplement: 1471-2105-15-182-S7.pdf [file 1471-2105-15-182-S7.pdf]

**Appendix C. An example of trimming real paired-end reads**

>paired-read1

AGCTGACGTAATACCTATTTGTGGCATAACAAGAAAAGGGGATAGATATATGTAGAGAAA**AGATCG**  
**GNNGAGCACACGTCTGAACTCCAGTCACACANTGA**

>paired-read2

TTTCTCTNNNNNNNNNNNNCCCTTTTCTTGTTATGCCACAAATAGGTATTACGTCANNNNNNNNN  
NNNNNNNNNNNNNNNNNNNNNNNNNNNNNNNNNNNNNNNNNNNNNNNN

>trimmed

AGCTGACGTAATACCTATTTGTGGCATAACAAGAAAAGGGGATAGATATATGTAGAGAAA
